# Supplementary material
Source: PubMed Central journal article supplement (PMC4061985)
Supplement: NIHMS389227-supplement-Supp_Table_1.pdf [file NIHMS389227-supplement-Supp_Table_1.pdf]

**Supplementary Table I: DR0901 Preference and Pocket 6 Array**

| P1 Residue | Value       | P4 Residue | Value       | P6 Residue | Value       | Charge | P7 Residue | Value       | P9 Residue | "-1" Value  | "0" Value   | "1" Value   | "0.5" Value |
|------------|-------------|------------|-------------|------------|-------------|--------|------------|-------------|------------|-------------|-------------|-------------|-------------|
| G          | 0.00        | G          | <b>2.31</b> | G          | 0.80        | 0      | G          | 0.50        | G          | 0.05        | 1.00        | 0.03        | 0.04        |
| A          | 0.05        | A          | <b>1.32</b> | A          | <b>1.59</b> | 0      | A          | <b>1.35</b> | A          | <b>0.09</b> | <b>1.08</b> | <b>0.04</b> | 0.06        |
| V          | <b>0.16</b> | V          | 0.75        | V          | 0.80        | 0      | V          | 1.80        | V          | 0.35        | 0.90        | 0.13        | 0.24        |
| L          | <b>0.16</b> | L          | <b>0.02</b> | L          | <b>0.65</b> | 0.5    | L          | 2.20        | L          | <b>0.25</b> | <b>0.69</b> | <b>0.13</b> | 0.19        |
| I          | 0.20        | I          | 0.02        | I          | 0.65        | 0      | I          | 2.50        | I          | <b>1.00</b> | 1.00        | 1.00        | 1.00        |
| M          | <b>0.12</b> | M          | <b>0.50</b> | M          | <b>0.94</b> | 0.5    | M          | <b>3.66</b> | M          | <b>0.29</b> | <b>0.96</b> | <b>0.34</b> | 0.32        |
| P          | 0.00        | P          | <b>0.25</b> | P          | <b>1.39</b> | 0.5    | P          | <b>2.47</b> | P          | <b>0.05</b> | <b>0.53</b> | <b>0.05</b> | 0.05        |
| F          | <b>1.00</b> | F          | 0.25        | F          | 0.65        | 0.5    | F          | <b>3.11</b> | F          | 0.25        | 0.85        | 0.15        | 0.20        |
| W          | 0.62        | W          | 0.02        | W          | 0.55        | 0.5    | W          | 2.80        | W          | <b>0.16</b> | 0.85        | 0.15        | 0.16        |
| S          | 0.00        | S          | <b>1.00</b> | S          | <b>1.41</b> | 0      | S          | <b>0.77</b> | S          | <b>0.11</b> | <b>0.63</b> | <b>0.02</b> | 0.11        |
| T          | 0.00        | T          | 0.40        | T          | 1.17        | 0      | T          | 1.50        | T          | 0.13        | 0.60        | 0.04        | 0.09        |
| N          | 0.00        | N          | <b>0.15</b> | N          | <b>0.88</b> | 0      | N          | <b>3.26</b> | N          | <b>0.04</b> | 0.60        | 0.05        | 0.05        |
| Q          | 0.00        | Q          | <b>0.06</b> | Q          | 0.70        | 0.5    | Q          | 2.80        | Q          | 0.03        | 0.60        | 0.06        | 0.05        |
| Y          | <b>0.65</b> | Y          | <b>0.02</b> | Y          | <b>0.65</b> | 0.5    | Y          | <b>2.14</b> | Y          | <b>0.34</b> | <b>0.92</b> | <b>0.15</b> | 0.24        |
| C          | 0.00        | C          | 0.13        | C          | 0.50        | 0      | C          | 0.70        | C          | 0.04        | 0.50        | 0.02        | 0.03        |
| K          | 0.00        | K          | 0.07        | K          | 0.60        | 1      | K          | <b>1.00</b> | K          | 0.02        | 0.70        | 0.01        | 0.02        |
| R          | 0.00        | R          | <b>0.06</b> | R          | <b>0.61</b> | 1      | R          | <b>1.66</b> | R          | <b>0.01</b> | 0.60        | 0.01        | 0.01        |
| H          | 0.00        | H          | <b>0.87</b> | H          | <b>0.94</b> | 1      | H          | <b>2.97</b> | H          | <b>0.15</b> | <b>0.53</b> | <b>0.03</b> | 0.09        |
| D          | 0.00        | D          | <b>0.04</b> | D          | <b>1.00</b> | -1     | D          | <b>0.50</b> | D          | <b>0.14</b> | <b>1.26</b> | <b>0.04</b> | 0.09        |
| E          | 0.00        | E          | <b>0.01</b> | E          | 0.88        | -1     | E          | 0.40        | E          | <b>0.10</b> | <b>0.55</b> | <b>0.02</b> | 0.06        |
